# Supplementary material
Source: bioRxiv or medRxiv preprint supplement (https://medrxiv.org/highwire/filestream/89036/field_highwire_adjunct_files/0/2020.03.30.20045971-1.pdf)
Supplement: Supplementary file [file 2020.03.30.20045971-1.pdf]

1 **Table S1.** Models that describe the impacts of size (weight) and maturation (age) on  
 2 clearance.

| Model description |                                            | Formula                                                                                                                                          |
|-------------------|--------------------------------------------|--------------------------------------------------------------------------------------------------------------------------------------------------|
| Model I           | Base model                                 | $CL = CL_{pop} \times \left( \frac{WT}{WT_{median}} \right)^{k_1}$                                                                               |
| Model II          | Simple exponent model                      | $CL = CL_{pop} \times \left( \frac{WT}{WT_{median}} \right)^{k_1} \times \left( \frac{Age}{Age_{median}} \right)^{beta1}$                        |
| Model III         | Sigmoid maturation model                   | $CL = CL_{pop} \times \left( \frac{WT}{WT_{median}} \right)^{k_1} \times MF$<br>$MF = \frac{1}{1 + \left( \frac{Age}{MT_{50}} \right)^\gamma}$   |
| Model IV          | Age-dependent exponent (ADE) model         | $CL = CL_{pop} \times \left( \frac{WT}{WT_{median}} \right)^{k_1}$<br>$k_1 = k_0 - \frac{k_{max} \times Age^\gamma}{k_{50}^\gamma + Age^\gamma}$ |
| Model V           | Body weight-dependent exponent (BDE) model | $CL = CL_{pop} \times \left( \frac{WT}{WT_{median}} \right)^{k_1}$<br>$k_1 = k_0 - \frac{k_{max} \times WT^\gamma}{k_{50}^\gamma + WT^\gamma}$   |

3 CL is the typical clearance of a given individual, and  $CL_{pop}$  is population typical value of  
 4 vancomycin clearance. WT is the weight of a given individual and  $WT_{median}$  is median  
 5 weight of the population.  $k_1$  is the exponent.

6 Model I: in the base model, the exponent  $k_1$  is fixed to 0.75.

7 Model II: in the simple exponent model, the exponent  $k_1$  is fixed to 0.75. Age (i.e:  
 8 gestational age (GA), gestational age (PNA), and Postmenstrual age (PMA)) with  
 9 exponential function is tested to explore the effect on vancomycin clearance.

10 Model III: in the sigmoid maturation model, the exponent  $k_1$  is fixed to 0.75. MF represents  
 11 the maturation factor (MF) which defines the maturing process.  $MT_{50}$  is the value of age  
 12 when maturation reaches 50% of the adult clearance, and  $\gamma$  is the Hill coefficient which  
 13 controls the slope of sigmoid function.

14 Model IV and V: Age-dependent exponent (ADE) model and body weight-dependent  
 15 exponent (BDE) model respectively.  $k_0$  is the value of the exponent at birth (0 years)  
 16 (Model IV) or at a theoretical weight of zero (Model V),  $k_{max}$  is the maximum decrease of

17 the exponent,  $k_{50}$  is the age (Model IV) or weight (Model V) at which a 50 % decrease in  
18 the maximum decrease is attained, and  $\gamma$  is the Hill coefficient used to determine the  
19 steepness of the sigmoid decline.

20 **Table S2.** Calculation of mean prediction error (MPE) and mean absolute prediction  
 21 error (MAPE).

| Formula <sup>a</sup>                      |                                                                             |
|-------------------------------------------|-----------------------------------------------------------------------------|
| Mean prediction error*<br>(MPE)           | $MPE (\%) = \frac{1}{N} \sum \frac{IPRED_i - OBS_i}{OBS_i}$                 |
| Mean absolute prediction<br>error* (MAPE) | $MAPE (\%) = \frac{1}{N} \sum \left  \frac{IPRED_i - OBS_i}{OBS_i} \right $ |

22 <sup>a</sup>IPRED<sub>i</sub> and OBS<sub>i</sub> is individual prediction and the observation of the i<sup>th</sup> subject, and N is  
 23 the number of subjects in the data set of the external evaluation.

24 \*MPE and MAPE values within the range of 20% and 30% respectively were considered  
 25 acceptable for the final model.

26 **Table S3.** Demographic and clinical data for neonates in this study.

| Variables                                           | Median (range/proportion) |
|-----------------------------------------------------|---------------------------|
| <b>Maturation</b>                                   |                           |
| Gender                                              | 102/80 (male/female)      |
| Gestational age (weeks)                             | 30.71 (22.29~41.29)       |
| Postnatal age (weeks)                               | 1.57 (0.14~12.43)         |
| Postmenstrual age (weeks)                           | 33.00 (22.29~44.43)       |
| Birth weight (kg)                                   | 1.64 (0.55~4.40)          |
| Current weight (kg)                                 | 1.54 (0.55~5.57)          |
| <b>Renal Function</b>                               |                           |
| Serum creatinine ( $\mu\text{mol/L}$ )              | 28.45 (3.90~77.50)        |
| Creatinine clearance [(mL/min)/1.73m <sup>2</sup> ] | 33.22 (9.69~142.18)       |
| <b>PK/PD Parameters</b>                             |                           |
| Daily dose (mg/kg)                                  | 29.78 (11.41~62.07)       |
| Clearance [L/(h·kg)]                                | 0.06 (0.02~0.16)          |
| Vancomycin trough (mg/L)                            | 10.92 (3.11~51.36)        |
| AUC <sub>0-24</sub> (mg·h/L)                        | 361 (191~788)             |
| AUC <sub>24-48</sub> (mg·h/L)                       | 532 (265~1066)            |
| AUC <sub>0-48</sub> (mg·h/L)                        | 898 (456~1854)            |
| <b>Comorbidities</b>                                |                           |
| Patent ductus arteriosus                            | 83 (45.60%)               |
| Pneumonia                                           | 78 (42.86%)               |
| Bronchopulmonary dysplasia                          | 43 (23.63%)               |
| Meningitis                                          | 37 (20.33%)               |
| Neonatal necrotic enterocolitis                     | 33 (18.13%)               |
| Persistent pulmonary hypertension of newborn        | 16 (8.79%)                |
| <b>Co-medication</b>                                |                           |
| Meropenem                                           | 89 (48.90%)               |
| Vasoactive drugs                                    | 39 (21.43%)               |
| Furosemide                                          | 30 (16.48%)               |
| Ibuprofen                                           | 8 (4.40%)                 |
| <b>Outcome</b>                                      |                           |
| Mortality                                           | 15 (8.24%)                |

28 **Table S4.** Results of covariate screening and population pharmacokinetic modeling.

| Model description <sup>a</sup>     | OFV <sup>b</sup> | AIC <sup>c</sup> | BIC <sup>d</sup> | V <sub>pop</sub><br>(RSE%) <sup>e</sup> | CL <sub>pop</sub><br>(RSE%) <sup>f</sup> | V(CV%)<br>(RSE%) <sup>g</sup> | CL(CV%)<br>(RSE%) <sup>h</sup> | Shrinkage_<br>V(%) <sup>i</sup> | Shrinkage<br>_CL(%) | b<br>(RSE%) <sup>j</sup> |
|------------------------------------|------------------|------------------|------------------|-----------------------------------------|------------------------------------------|-------------------------------|--------------------------------|---------------------------------|---------------------|--------------------------|
| Model I                            | 2698             | 2708             | 2724             | 0.91<br>(3.90)                          | 0.10<br>(3.48)                           | 16%<br>(18.00)                | 44%<br>(5.92)                  | -6.37                           | 0.17                | 0.23<br>(4.98)           |
| Step 1: Size and maturation        |                  |                  |                  |                                         |                                          |                               |                                |                                 |                     |                          |
| Model II                           |                  |                  |                  |                                         |                                          |                               |                                |                                 |                     |                          |
| GA on CL                           | 2622             | 2634             | 2653             | 0.90<br>(3.17)                          | 0.09<br>(2.94)                           | 11%<br>(30.60)                | 35%<br>(6.19)                  | -1.91                           | 0.87                | 0.23<br>(4.8)            |
| PNA on CL                          | 2665             | 2677             | 2697             | 0.92<br>(4.3)                           | 0.10<br>(3.32)                           | 21%<br>(21.60)                | 42%<br>(5.89)                  | -1.33                           | 0.90                | 0.21<br>(5.23)           |
| <b>PMA on<br/>CL</b>               | 2528             | 2540             | 2560             | 0.85<br>(3.17)                          | 0.08<br>(2.37)                           | 12%<br>(24.40)                | 28%<br>(6.28)                  | -0.98                           | -0.22               | 0.21<br>(4.91)           |
| Model III                          | 2533             | 2547             | 2569             | 0.85<br>(3.87)                          | 0.29<br>(11.60)                          | 9%<br>(25.50)                 | 28%<br>(6.41)                  | 4.54                            | -0.17               | 0.21<br>(4.82)           |
| Model IV                           | 2562             | 2580             | 2608             | 0.87<br>(3.36)                          | 0.09<br>(2.58)                           | 15%<br>(17.10)                | 30%<br>(6.30)                  | -0.82                           | -1.42               | 0.22<br>(4.87)           |
| Model V                            | 2554             | 2572             | 2601             | 0.86<br>(3.31)                          | 0.09<br>(2.57)                           | 17%<br>(18.50)                | 30%<br>(6.24)                  | -1.77                           | -0.21               | 0.21<br>(4.88)           |
| Step 2: Renal function             |                  |                  |                  |                                         |                                          |                               |                                |                                 |                     |                          |
| <b>PMA, SCR<br/>on CL</b>          | 2494             | 2508             | 2530             | 0.86<br>(2.59)                          | 0.08<br>(2.13)                           | 10%<br>(20.20)                | 25%<br>(6.74)                  | 1.07                            | -1.76               | 0.22<br>(4.82)           |
| PMA,<br>CLCR on<br>CL              | 2492             | 2506             | 2528             | 0.87<br>(2.78)                          | 0.08<br>(2.15)                           | 11%<br>(25.80)                | 25%<br>(6.69)                  | -0.11                           | 0.69                | 0.22<br>(4.85)           |
| Step 3: VAS                        |                  |                  |                  |                                         |                                          |                               |                                |                                 |                     |                          |
| <b>PMA,<br/>SCR, VAS<br/>on CL</b> | 2484             | 2499             | 2525             | 0.86<br>(3.02)                          | 0.09<br>(2.11)                           | 11%<br>(24.20)                | 24%<br>(6.85)                  | -4.72                           | 1.67                | 0.21<br>(5.01)           |

29 <sup>a</sup>**Bold font represents the selected models in each step;**

30 <sup>b</sup>OFV, objective function value;

31 <sup>c</sup>AIC, Akaike information criteria;

32 <sup>d</sup>BIC, Bayesian information criteria;

33 <sup>e</sup>V<sub>pop</sub>, population typical value of volume of distribution;

34 <sup>f</sup>CL<sub>pop</sub>, population typical value of clearance.

35 <sup>g</sup>V (CV%), interindividual variability of volume of distribution.

36 <sup>h</sup>CL (CV%), standard deviation of the random effects of clearance.

37 <sup>i</sup>In Monolix, shrinkage of each PK parameter is calculated from the empirical variance of the random effects var( $\eta_i$ ) and the estimated  
38 variance  $\omega^2$  (Equation S1). Instead of using the shrunk conditional empirical bayes estimates (EBEs) or conditional mean, Monolix uses  
39 parameter values randomly sampled from the conditional distribution to circumvent shrinkage.

40 
$$\text{shrinkage} = 1 - \frac{\text{var}(\eta_i)}{\omega^2} \quad (\text{S1})$$

41 <sup>j</sup>b, residual error parameter.

42 **Table S5.** Results of final model and external evaluation.

| Parameter <sup>a</sup>              | Original data set |                      | New data set <sup>c</sup> |         |
|-------------------------------------|-------------------|----------------------|---------------------------|---------|
|                                     | Value             | RSE (%) <sup>b</sup> | Value                     | RSE (%) |
| <b>Structure model parameter</b>    |                   |                      |                           |         |
| V <sub>pop</sub> (L)                | 0.86              | 3.02                 | 0.86                      | 3.85    |
| CL <sub>pop</sub> (L/h)             | 0.09              | 2.11                 | 0.09                      | 2.10    |
| beta1                               | 2.35              | 1.20                 | 2.40                      | 3.03    |
| beta2                               | 0.18              | 3.41                 | 0.22                      | 2.86    |
| F <sub>VAS</sub>                    | 0.86              | 0.34                 | 0.86                      | 0.30    |
| <b>Inter-individual variability</b> |                   |                      |                           |         |
| V (%CV)                             | 11.20%            | 24.20                | 14.60%                    | 21.40   |
| CL (%CV)                            | 23.70%            | 6.85                 | 23.00%                    | 6.79    |
| <b>Residual variability</b>         |                   |                      |                           |         |
| Proportional (%CV)                  | 21.40%            | 4.82                 | 21.40%                    | 5.04    |

43 <sup>a</sup>V<sub>pop</sub>, population mean estimate for volume of distribution in a subject with a body weight  
 44 of 1.5 kg; cWT, current body weight; CL<sub>pop</sub>, population mean estimate for vancomycin  
 45 clearance in a subject with a body weight of 1.5 kg; PMA, postmenstrual age; SCR, serum  
 46 creatinine; F<sub>VAS</sub>, scaling factor of concomitant use of vasoactive drugs; V (%CV),  
 47 interindividual variability of volume of distribution; CL (%CV), interindividual variability  
 48 of vancomycin clearance.

49 <sup>b</sup>RSE, relative standard error.

50 <sup>c</sup>A new data set combines original data set and the data set of external validation.

51 **Table S6.** Predictive matrices of classification and regression tree (CART) derived and  
 52 other candidate AUCs in predicting AKI.

| AUC(mg·h/L)                | Sensitivity(%) | Specificity(%) | PPV <sup>a</sup> (%) | NPV <sup>b</sup> (%) | AUC <sub>ROC</sub> <sup>c</sup> (95%CI) |
|----------------------------|----------------|----------------|----------------------|----------------------|-----------------------------------------|
| <b>AUC<sub>0-24</sub></b>  |                |                |                      |                      |                                         |
| ≥300                       | 85.71          | 22.86          | 4.26                 | 97.56                | 0.54 (0.40, 0.69)                       |
| ≥350                       | 71.43          | 44.57          | 4.90                 | 97.50                | 0.58 (0.40, 0.76)                       |
| ≥400                       | 57.14          | 66.86          | 6.45                 | 97.50                | 0.62 (0.42, 0.82)                       |
| ≥450                       | 57.14          | 81.71          | 11.11                | 97.95                | 0.69 (0.49, 0.89)                       |
| ≥485*                      | 57.14          | 90.29          | 19.05                | 98.14                | 0.74 (0.54, 0.94)                       |
| ≥500                       | 42.86          | 91.43          | 16.67                | 97.56                | 0.67 (0.47, 0.87)                       |
| ≥550                       | 28.57          | 96.57          | 25.00                | 97.13                | 0.63 (0.44, 0.81)                       |
| ≥600                       | 14.29          | 99.43          | 50.00                | 96.67                | 0.57 (0.43, 0.71)                       |
| <b>AUC<sub>24-48</sub></b> |                |                |                      |                      |                                         |
| ≥400                       | 85.71          | 13.71          | 3.82                 | 96.00                | 0.50 (0.35, 0.64)                       |
| ≥450                       | 85.71          | 26.29          | 4.44                 | 97.87                | 0.56 (0.42, 0.70)                       |
| ≥500                       | 85.71          | 41.71          | 5.56                 | 98.65                | 0.64 (0.49, 0.78)                       |
| ≥550                       | 57.14          | 57.71          | 5.13                 | 97.12                | 0.57 (0.37, 0.78)                       |
| ≥600                       | 57.14          | 72.57          | 7.69                 | 97.69                | 0.65 (0.45, 0.85)                       |
| ≥622*                      | 57.14          | 76.00          | 8.70                 | 97.79                | 0.67 (0.47, 0.87)                       |
| ≥650                       | 42.86          | 81.71          | 8.57                 | 97.28                | 0.62 (0.42, 0.82)                       |
| ≥700                       | 42.86          | 86.86          | 11.54                | 97.44                | 0.65 (0.45, 0.85)                       |
| ≥750                       | 28.57          | 89.71          | 10.00                | 96.91                | 0.59 (0.41, 0.77)                       |
| ≥800                       | 28.57          | 93.14          | 14.29                | 97.02                | 0.61 (0.43, 0.79)                       |
| ≥850                       | 14.29          | 96.57          | 14.29                | 96.57                | 0.55 (0.41, 0.69)                       |
| ≥900                       | 14.29          | 97.71          | 20.00                | 96.61                | 0.56 (0.42, 0.70)                       |
| <b>AUC<sub>0-48</sub></b>  |                |                |                      |                      |                                         |
| ≥800                       | 85.71          | 32.00          | 4.80                 | 98.25                | 0.59 (0.44, 0.73)                       |
| ≥850                       | 85.71          | 41.71          | 5.56                 | 98.65                | 0.64 (0.49, 0.78)                       |
| ≥900                       | 71.43          | 51.43          | 5.56                 | 97.83                | 0.61 (0.43, 0.80)                       |
| ≥950                       | 57.14          | 62.29          | 5.71                 | 97.32                | 0.60 (0.40, 0.80)                       |
| ≥1000                      | 57.14          | 70.29          | 7.14                 | 97.62                | 0.64 (0.44, 0.84)                       |
| ≥1050                      | 57.14          | 77.71          | 9.30                 | 97.84                | 0.67 (0.47, 0.87)                       |
| ≥1077*                     | 57.14          | 79.43          | 10.00                | 97.89                | 0.68 (0.48, 0.88)                       |
| ≥1100                      | 57.14          | 82.86          | 11.76                | 97.97                | 0.70 (0.50, 0.90)                       |
| ≥1150                      | 42.86          | 86.29          | 11.11                | 97.42                | 0.65 (0.45, 0.85)                       |
| ≥1200                      | 42.86          | 89.71          | 14.29                | 97.52                | 0.66 (0.46, 0.86)                       |

53



- 54 \* represents CART-derived threshold.
- 55 <sup>a</sup>PPV, positive predictive values.
- 56 <sup>b</sup>NPV, negative predictive values.
- 57 <sup>c</sup>AUC<sub>ROC</sub>, an area under receiver operating characteristic (ROC) curve.

58 **Table S7.** Results of univariate logistic regression.

| Variable                                            | AKI analysis                  |       | Efficacy analysis                    |       |
|-----------------------------------------------------|-------------------------------|-------|--------------------------------------|-------|
|                                                     | OR (95% CI)                   | P     | OR (95% CI)                          | P     |
| AUC <sub>0-24</sub> (mg·h/L)                        | 1.01 (1.00, 1.02)             | <0.01 | /                                    | /     |
| AUC <sub>0-24</sub> ≥ 485 mg·h/L                    | 12.39 (2.56, 60.06)           | <0.01 | /                                    | /     |
| AUC <sub>0-24</sub> /MIC                            | /                             | /     | 1.02 (1.00, 1.05)                    | <0.05 |
| AUC <sub>0-24</sub> /MIC ≥ 234                      | /                             | /     | 36.00 (3.54, 365.98)                 | <0.01 |
| Gender                                              | 1.05 (0.23, 4.82)             | 0.95  | 0.42 (0.07, 2.48)                    | 0.34  |
| Gestational age (weeks)                             | 1.1 (0.94, 1.29)              | 0.25  | 1.18 (0.87, 1.6)                     | 0.28  |
| Postnatal age (weeks)                               | 0.14 (0.02, 0.77)             | <0.05 | 0.79 (0.36, 1.75)                    | 0.57  |
| Postmenstrual age (weeks)                           | 1.02 (0.87, 1.21)             | 0.79  | 1.15 (0.86, 1.52)                    | 0.35  |
| Birth weight (kg)                                   | 1.20 (0.53, 2.73)             | 0.66  | 747.97 (3.77, 1.49×10 <sup>5</sup> ) | <0.05 |
| Current weight (kg)                                 | 1.04 (0.45, 2.39)             | 0.93  | 39.84 (1.64, 966.64)                 | <0.05 |
| Serum creatinine (μmol/L)                           | /                             | /     | 1.01 (0.94, 1.10)                    | 0.73  |
| Creatinine clearance [(mL/min)/1.73m <sup>2</sup> ] | /                             | /     | 1.02 (0.95, 1.09)                    | 0.58  |
| Vasoactive drugs                                    | 25.82 (3.01, 221.74)          | <0.01 | 0.36 (0.03, 4.67)                    | 0.44  |
| Meropenem                                           | 7.29×10 <sup>8</sup> (0, Inf) | 0.99  | 1.15 (0.19, 6.85)                    | 0.88  |
| Furosemide                                          | 7.64 (1.62, 36.14)            | <0.05 | 0.18 (0.01, 3.22)                    | 0.24  |
| Ibuprofen                                           | 0 (0, Inf)                    | 1.00  | 3.22×10 <sup>7</sup> (0, Inf)        | 1.00  |
| Patent ductus arteriosus                            | 7.87×10 <sup>7</sup> (0, Inf) | 0.99  | 0.53 (0.10, 2.82)                    | 0.46  |
| Pneumonia                                           | 1.82 (0.40, 8.38)             | 0.44  | 0.40 (0.07, 2.15)                    | 0.28  |
| Bronchopulmonary dysplasia                          | 1.31 (0.24, 6.99)             | 0.75  | 0.42 (0.06, 2.77)                    | 0.37  |
| Meningitis                                          | 0.64 (0.08, 5.52)             | 0.69  | 9.61×10 <sup>6</sup> (0, Inf)        | 0.99  |
| Neonatal necrotic enterocolitis                     | 1.86 (0.34, 10.02)            | 0.47  | 2.70×10 <sup>7</sup> (0, Inf)        | 1.00  |
| Persistent pulmonary hypertension of newborn        | 4.60 (0.82, 25.9)             | 0.08  | 9.02×10 <sup>6</sup> (0, Inf)        | 1.00  |

59 Inf, infinity.

60 **Table S8.** Predictive matrices of classification and regression tree (CART) derived and  
 61 other candidate AUC/MICs in predicting efficacy.

| AUC/MIC                        | Sensitivity(%) | Specificity(%) | PPV <sup>a</sup> (%) | NPV <sup>b</sup> (%) | AUC <sub>ROC</sub> <sup>c</sup> (95%CI) |
|--------------------------------|----------------|----------------|----------------------|----------------------|-----------------------------------------|
| <b>AUC<sub>0-24</sub>/MIC</b>  |                |                |                      |                      |                                         |
| ≥200                           | 88.57          | 57.14          | 91.18                | 50.00                | 0.73 (0.52, 0.93)                       |
| ≥234*                          | 85.71          | 85.71          | 96.77                | 54.55                | 0.86 (0.71, 1.00)                       |
| ≥250                           | 65.71          | 100.00         | 100.00               | 28.00                | 0.83 (0.37, 1.00)                       |
| ≥300                           | 45.71          | 100.00         | 100.00               | 26.92                | 0.73 (0.64, 0.81)                       |
| ≥350                           | 34.29          | 100.00         | 100.00               | 23.33                | 0.67 (0.59, 0.75)                       |
| ≥400                           | 31.43          | 100.00         | 100.00               | 22.58                | 0.66 (0.58, 0.74)                       |
| <b>AUC<sub>24-48</sub>/MIC</b> |                |                |                      |                      |                                         |
| ≥200                           | 14.29          | 14.29          | 84.21                | 25.00                | 0.53 (0.38, 0.68)                       |
| ≥250                           | 74.29          | 92.86          | 92.86                | 35.71                | 0.73 (0.53, 0.92)                       |
| ≥278*                          | 62.86          | 100.00         | 100.00               | 35.00                | 0.81 (0.73, 0.90)                       |
| ≥300                           | 48.57          | 100.00         | 100.00               | 28.00                | 0.74 (0.66, 0.83)                       |
| ≥350                           | 42.86          | 100.00         | 100.00               | 25.93                | 0.71 (0.63, 0.80)                       |
| ≥400                           | 37.14          | 100.00         | 100.00               | 24.14                | 0.69 (0.60, 0.77)                       |
| <b>AUC<sub>0-48</sub>/MIC</b>  |                |                |                      |                      |                                         |
| ≥300                           | 97.14          | 14.29          | 85.00                | 50.00                | 0.56 (0.41, 0.70)                       |
| ≥350                           | 85.71          | 28.57          | 85.71                | 28.57                | 0.57 (0.38, 0.76)                       |
| ≥400                           | 80.00          | 57.14          | 90.32                | 36.36                | 0.69 (0.48, 0.89)                       |
| ≥450*                          | 65.71          | 100.00         | 100.00               | 36.84                | 0.83 (0.75, 0.91)                       |
| ≥500                           | 48.57          | 100.00         | 100.00               | 28.00                | 0.74 (0.66, 0.83)                       |
| ≥550                           | 45.71          | 100.00         | 100.00               | 26.92                | 0.73 (0.64, 0.81)                       |
| ≥600                           | 40.00          | 100.00         | 100.00               | 25.00                | 0.70 (0.62, 0.78)                       |

62 \* represents CART-derived threshold.

63 <sup>a</sup>PPV, positive predictive values.

64 <sup>b</sup>NPV, negative predictive values.

65 <sup>c</sup>AUC<sub>ROC</sub>, an area under receiver operating characteristic (ROC) curve.

66

67

68

69 **Table S9.** Dose recommendations in current references

| Reference               | Age (week) / SCR<br>( $\mu\text{mol/L}$ ) <sup>a</sup> | Dose recommendations <sup>b</sup><br>(mg/kg) |
|-------------------------|--------------------------------------------------------|----------------------------------------------|
| Neonatal Formulary<br>7 | PMA <29                                                | 20, q24h                                     |
|                         | PMA 30~33                                              | 20, q18h                                     |
|                         | PMA 34~37                                              | 20, q12h                                     |
|                         | PMA 38~44                                              | 15, q8h                                      |
|                         | PMA > 45                                               | 10, q6h                                      |
| Red Book (2018)         | GA $\leq$ 28                                           | LD: 20                                       |
|                         | SCR <44.2                                              | MD: 15, q12h                                 |
|                         | SCR 44.2~61.7                                          | MD: 20, q24h                                 |
|                         | SCR 70.6~88.2                                          | MD: 15, q24h                                 |
|                         | SCR 97.0~123.5                                         | MD: 10, q24h                                 |
|                         | SCR >123.5                                             | MD: 15, q48h                                 |
|                         | GA > 28                                                | LD: 20                                       |
|                         | SCR <61.7                                              | MD: 15, q12h                                 |
|                         | SCR 61.7~79.4                                          | MD: 20, q24h                                 |
|                         | SCR 88.2~105.8                                         | MD: 15, q24h                                 |
|                         | SCR 114.7~141.2                                        | MD: 10, q24h                                 |
| SCR >141.2              | MD: 15, q48h                                           |                                              |

70 <sup>a</sup>SCR, serum creatine; PMA, postmenstrual age; GA, gestational age.71 <sup>b</sup>LD, loading dose; MD, maintenance dose.
